# Supplementary material for: Chemical and biological studies of gold(iii) complexes with uninegative bidentate N–N ligands
Source: Royal Society of Chemistry journal article supplement (doi:10.1039/b309310g), 2003-01-01
Supplement: b309310g.pdf [file b309310g.pdf]

Chemical and Biological Studies of Gold(III) Complexes with  
 Uninegative Bidentate N-N Ligands

Daming Fan, Chang-Tong Yang,<sup>\*</sup> John D. Ranford,<sup>\*</sup> and Jagadese J. Vittal

*Department of Chemistry, National University of Singapore, Singapore 117543.*

Electronic Supplementary Information:

Table S1. Important least-squares planes and dihedral angles for **2**.

|           |                                                                                                                                                                                                                                              |
|-----------|----------------------------------------------------------------------------------------------------------------------------------------------------------------------------------------------------------------------------------------------|
| A         | Equations of planes in the form $lX + mY + nZ = p$ where $X, Y, Z$ are orthogonal coordinates in Å. Deviations (Å) of atoms from the planes are given in square brackets.                                                                    |
| Plane (1) | Au(2), Cl(3), Cl(4), N(2), N(3); $-0.4295X + 0.7905Y + 0.4367Z = 6.3216$<br>[ Au(1) -2.2793, Cl(1) -3.7534, Cl(2) -3.9686, N(1) -0.7614, N(4) -0.9758, C(1) -0.3497, C(2) 0.7439, C(3) 0.9625, C(4) 0.8288, C(5) 0.4342, C(6) -0.6751 ]      |
| Plane (2) | Au(1), Cl(1), Cl(2), N(1), N(4); $0.6046X + 0.7331Y - 0.3115Z = -0.1343$<br>[ Au(2) -2.2648, Cl(3) -3.8717, Cl(4) -3.7618, N(2) -0.9191, N(3) -0.7695, C(1) 0.8603, C(2) 0.4573, C(3) -0.6519, C(4) -0.3198, C(5) 0.7300, C(6) 0.9175 ]      |
| Plane (3) | C(3), C(1), N(1), N(2); $0.4271X + 0.6906Y + 0.5836Z = 4.8313$<br>[ Au(1) 0.0129, Au(2) 0.2578, Cl(1) -1.8289, Cl(2) 0.0507, Cl(3) -1.5296, Cl(4) 0.6123, N(3) 1.7993, N(4) 1.6626, C(2) -0.0091, C(4) 3.1152, C(5) 3.7887, C(6) 2.8781 ]    |
| Plane (4) | Au(2), C(3), C(1), Au(1), N(1), N(2); $0.4425X + 0.7238Y + 0.5295Z = 4.6326$<br>[ Cl(1) -1.7793, Cl(2) -0.0224, Cl(3) -1.7502, Cl(4) 0.2678, N(3) 1.6286, N(4) 1.5471, C(2) 0.0510, C(4) 2.9163, C(5) 3.6274, C(6) 2.7682 ]                  |
| Plane (5) | Au(2), C(6), C(4), Au(1), N(3), N(4); $-0.2447X + 0.8851Y - 0.3960Z = -0.5576$                                                                                                                                                               |
| Plane (6) | C(4), C(6), N(3), N(4); $-0.2416X + 0.8470Y - 0.4736Z = -1.3445$                                                                                                                                                                             |
| Plane (7) | N(1), N(2), N(3), N(4); $0.1315X + 0.9876Y + 0.0858Z = 3.4705$<br>[ Au(1) -0.9153, Au(2) -0.9424, Cl(1) -1.8712, Cl(2) -1.9689, Cl(3) -2.0372, Cl(4) -1.8782, C(1) 0.8628, C(2) 1.2889, C(3) 0.7077, C(4) 0.9091, C(5) 1.3566, C(6) 0.7603 ] |
| B         | Dihedral angles (°) between planes                                                                                                                                                                                                           |
|           | (1)-(2): 79.4; (1)-(3): 51.9; (1)-(4): 52.2;<br>(1)-(7): 40.4; (2)-(3): 54.4; (2)-(7): 39.0;<br>(3)-(4): 3.7; (3)-(6): 78.1; (3)-(7): 38.0;<br>(4)-(5): 71.2; (5)-(6): 5.0; (6)-(7): 40.2;                                                   |

Table S2.  $^1\text{H}$  NMR Data for Picolinamide,  $[\text{Au}(\text{Hpla})\text{Cl}_2]\text{Cl}$ , and **1**.

| Compound                                       | Solvent                    | Hydrogen atoms on pyridine |         |         |         | NH      |
|------------------------------------------------|----------------------------|----------------------------|---------|---------|---------|---------|
| Picolinamide                                   | $\text{CDCl}_3$            | 8.57(d)                    | 8.19(d) | 7.85(t) | 7.44(t) | 6.15(b) |
| $[\text{Au}(\text{Hpla})\text{Cl}_2]\text{Cl}$ | $\text{D}_2\text{O}$       | 8.84(d)                    | 8.60(t) | 8.42(d) | 8.12(t) |         |
| <b>1</b>                                       | $\text{CDCl}_3$            | 9.44(d)                    | 8.40(t) | 8.15(d) | 7.92(t) | 6.46(b) |
| <b>1</b>                                       | $(\text{CD}_3)_2\text{CO}$ | 9.40(d)                    | 8.67(t) | 8.19(t) | 8.08(d) | 7.78(b) |
| <b>1</b>                                       | $\text{D}_2\text{O}$       | 9.38(d)                    | 8.48(t) | 8.16(t) | 8.02(d) |         |
| <b>1</b>                                       | $(\text{CD}_3)_2\text{SO}$ | 9.21(d)                    | 8.52(t) | 8.04(t) | 7.94(d) | 8.90(s) |

Table S3.  $^1\text{H}$  and  $^{13}\text{C}$  Data for complexes **2** and **3** ( $\delta$ , in  $\text{CDCl}_3$ )

| Compound         | Atoms on Pyrazoyl Ring                   | $\text{CH}_3$ |
|------------------|------------------------------------------|---------------|
| $^1\text{H}$     |                                          |               |
| Pyrazole         | 12.59, 7.64(d), 6.36(q)                  |               |
| <b>2</b>         | 7.99(d), 6.72(t)                         |               |
| 3-methylpyrazole | 12.22, 7.51(d), 6.08(d)                  | 2.36(s)       |
| <b>3</b>         | 7.79(d), 6.48(d); 7.75(d), 6.49(d)       | 2.55(s)       |
| $^{13}\text{C}$  |                                          |               |
| Pyrazole         | 136.5, 133.8, 104.8                      |               |
| <b>2</b>         | 150.4, 142.1                             |               |
| 3-methylpyrazole | 142.9, 134.7, 104.2                      | 11.8          |
| <b>3</b>         | 151.2, 141.4, 109.1; 150.9, 140.8, 109.4 | 14.4          |
